# Supplementary figures and images for: Dendritic cell vaccination and CD40-agonist combination therapy licenses T cell-dependent antitumor immunity in a pancreatic carcinoma murine model
Source: PubMed Central journal article supplement — J Immunother Cancer. 2020 Jul 20;8(2):e000772. doi: 10.1136/jitc-2020-000772 (PMC7373331; doi:10.1136/jitc-2020-000772), 2020-07-20

## Supplementary Figure 4

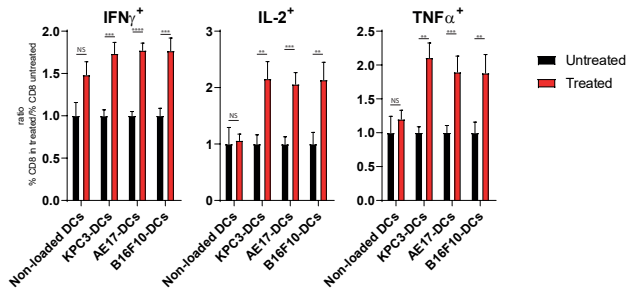

Supplement: jitc-2020-000772supp006.pdf [file jitc-2020-000772supp006.pdf]

## Supplementary Figure 12

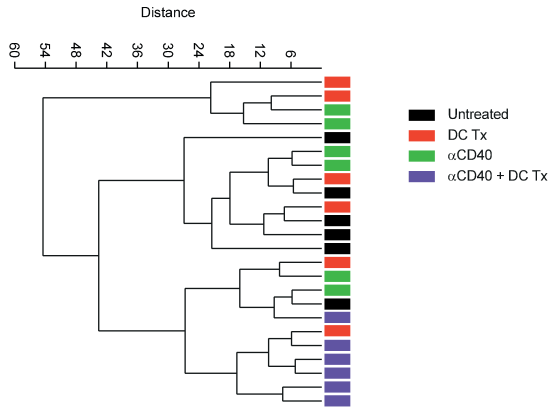

Supplement: jitc-2020-000772supp014.pdf [file jitc-2020-000772supp014.pdf]
